# Supplementary material
Source: PubMed Central journal article supplement (PMC3327614)

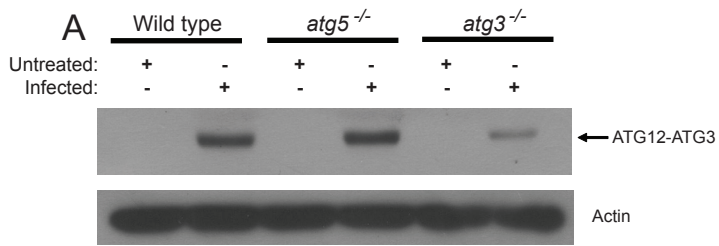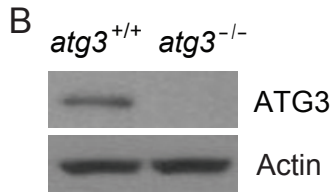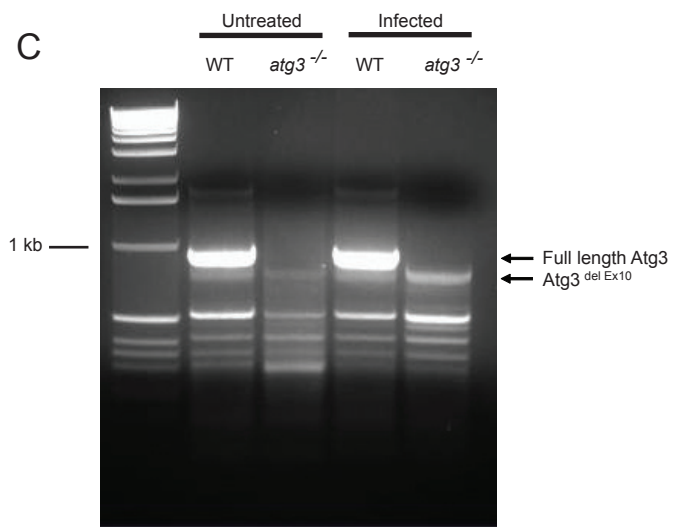

Supplement: auto-7-1434-s01.pdf [file auto-7-1434-s01.pdf]
